# Supplementary material for: Temperature- and pH-tunable plasmonic properties and SERS efficiency of the silver nanoparticles within the dual stimuli-responsive microgels
Source: Royal Society of Chemistry journal article supplement (doi:10.1039/c4tc00966e), 2014-01-01
Supplement: c4tc00966e1.pdf [file c4tc00966e1.pdf]

## Supporting Information

### **Temperature and pH tunable plasmonic property and SERS efficiency of the silver nanoparticles within the dual-stimuli responsive microgels**

Xiaoyun Liu<sup>a,b</sup>, Xiuqin Wang<sup>a</sup>, Liusheng Zha<sup>a,b,\*</sup>, Danli Lin<sup>b</sup>, Jianmao Yang<sup>b,\*</sup>,  
Jianfeng Zhou<sup>b</sup>, Li Zhang<sup>b</sup>

<sup>a</sup>State Key Laboratory for Modification of Chemical Fibers and Polymer Materials, Donghua University, Shanghai, 201620, People's Republic of China. E-mail: lszha@dhu.edu.cn

<sup>b</sup>Research Center for Analysis and Measurement, Donghua University, Shanghai, 201620, People's Republic of China

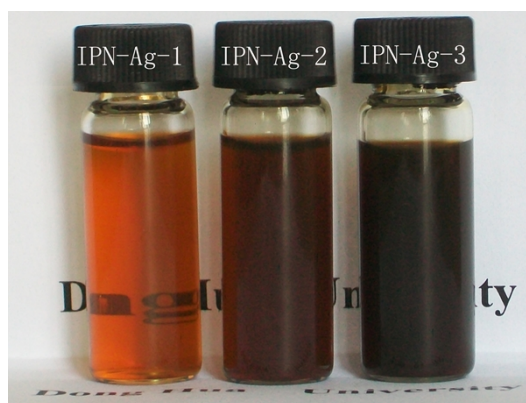

Figure S1 Appearance picture of AgNPs/(PNIPAM/PAA IPN) hybrid microgels aqueous dispersions with different AgNPs contents

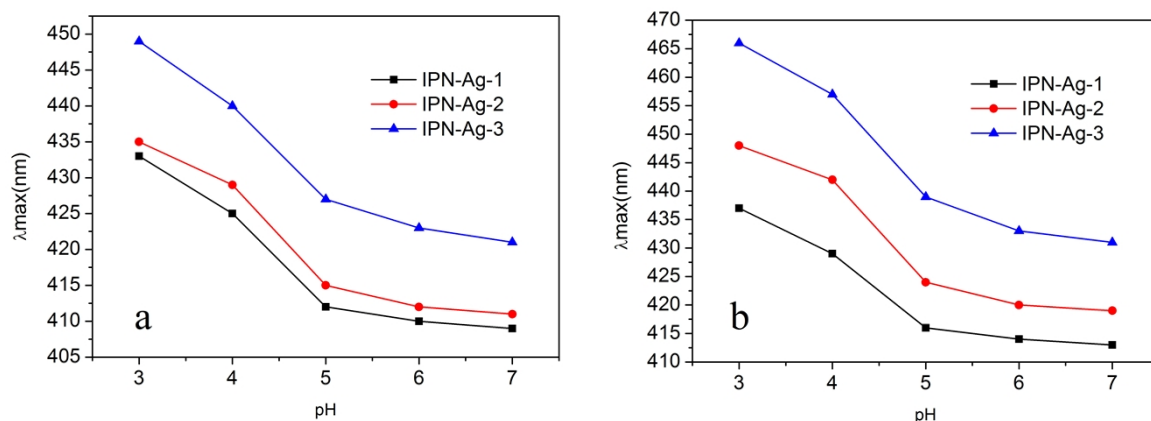

Figure S2 The plots between the  $\lambda_{max}$  and pH value for all AgNPs/(PNIPAM/PAA IPN) hybrid microgels under the temperature of 20°C (a) or 40°C (b)

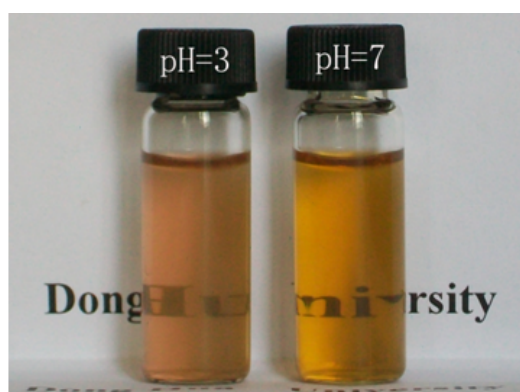

Figure S3 Appearance photo of AgNPs/(PNIPAM/PAA IPN) hybrid microgels dispersions at pH=3.0 (left) and pH=7.0 (right)

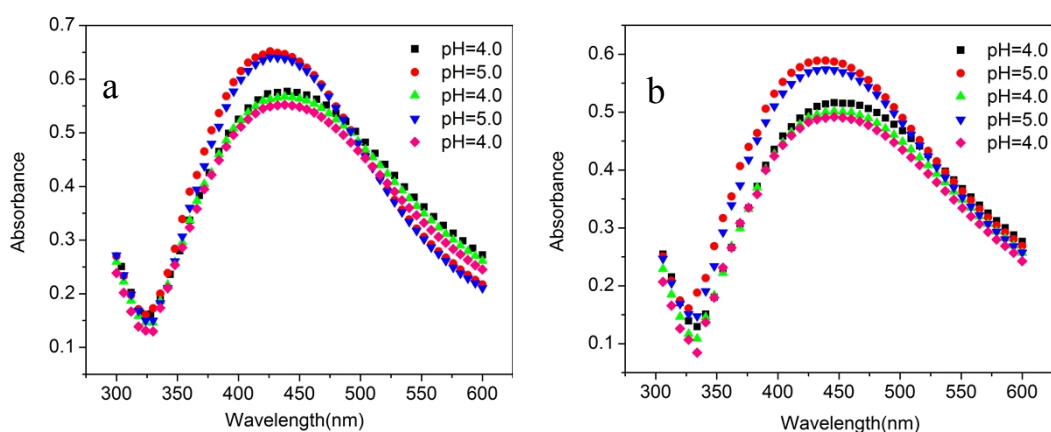

Figure S4 UV-vis spectra of IPN-Ag-3 aqueous dispersion at alternating pH between 4.0 and 5.0 under the temperature of 20°C (a) or 40°C (b)

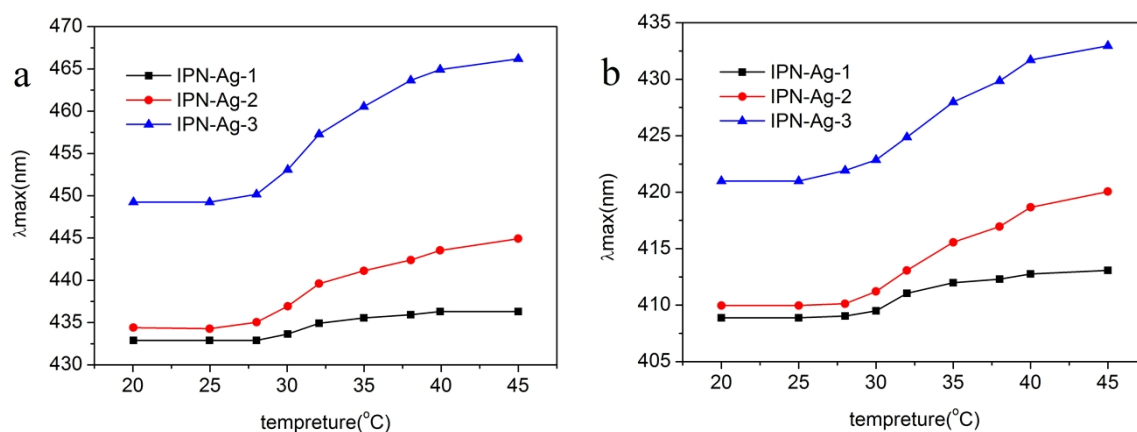

Figure S5 The plots between the  $\lambda_{max}$  and temperature for all AgNPs/(PNIPAM/PAA IPN) hybrid microgels under the pH value of 3.0 (a) or 7.0 (b)

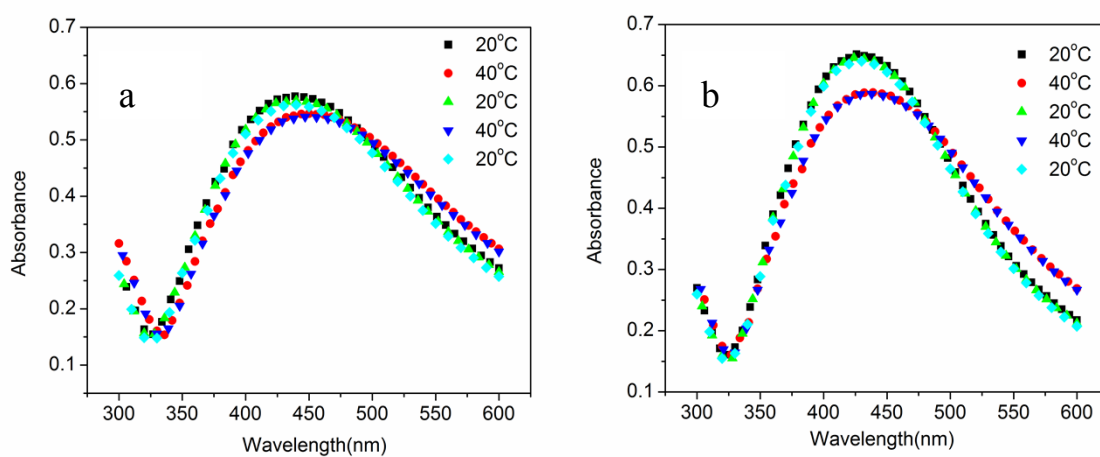

Figure S6 UV-vis spectra of IPN-Ag-3 aqueous dispersion at alternating temperature between 20°C and 40°C at the pH value of 3.0 (a) or 7.0 (b)

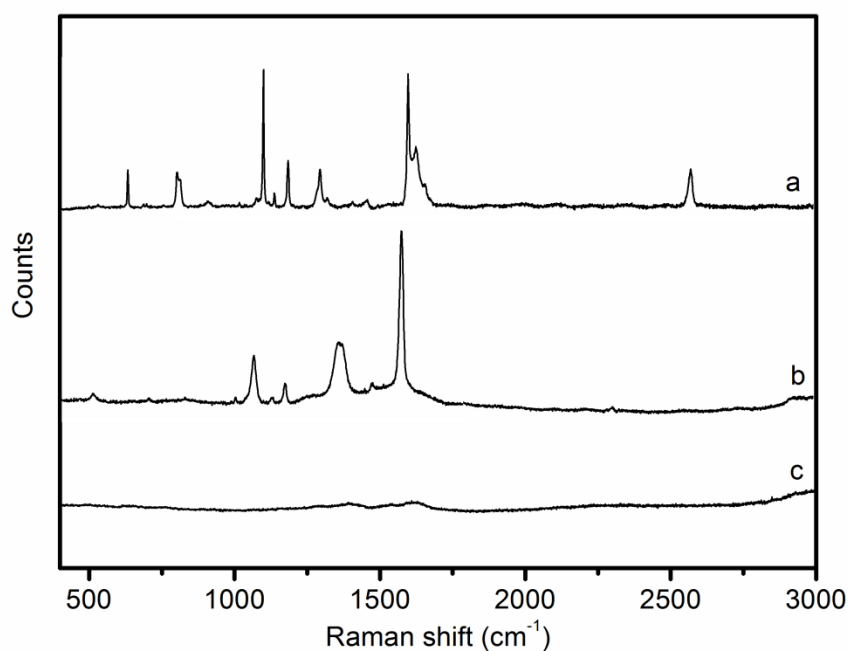

Figure S7 Raman spectrum of PMBA powder (a) and SERS spectrum of 10<sup>-6</sup> M PMBA in aqueous solution using AgNPs/(PNIPAM/PAA IPN) hybrid microgels as substrates (b) and Raman spectrum of pure AgNPs/(PNIPAM/PAA IPN) hybrid microgels in aqueous solution (c)

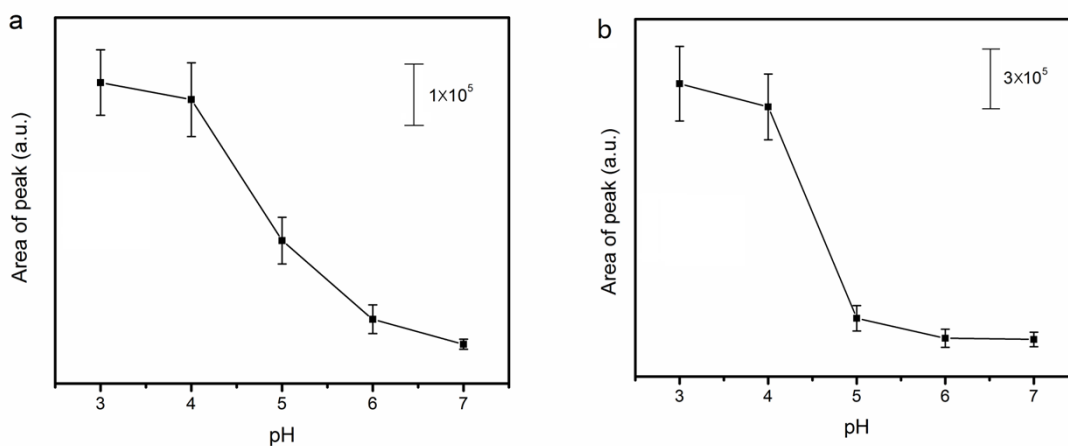

Figure S8 1584 cm<sup>-1</sup> peak areas in the SERS spectra of PMBA using AgNPs/(PNIPAM/PAA IPN) hybrid microgels as substrates as a function of pH value at 20°C (a) or 40°C (b)

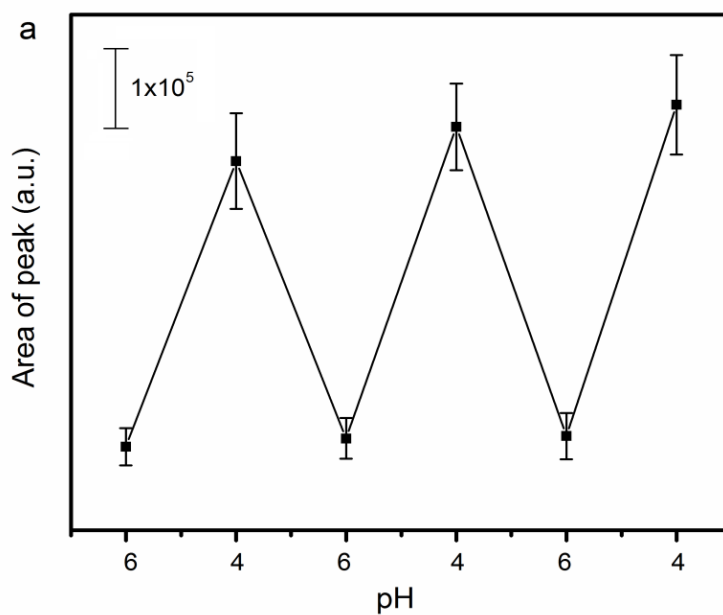

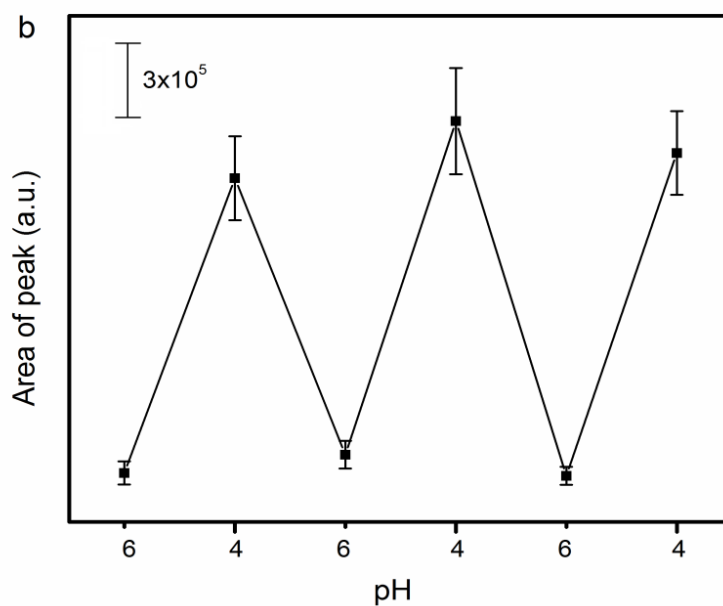

Figure S9 The areas of  $1584 \text{ cm}^{-1}$  peaks of the SERS spectra of PMBA using AgNPs/(PNIPAM/PAA IPN) hybrid microgels as substrates at alternating pH values between 4.0 and 6.0 at  $20^\circ\text{C}$  (a) or  $40^\circ\text{C}$  (b)

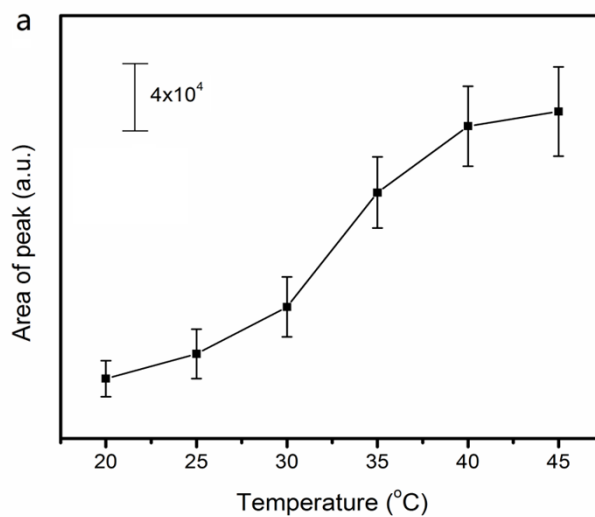

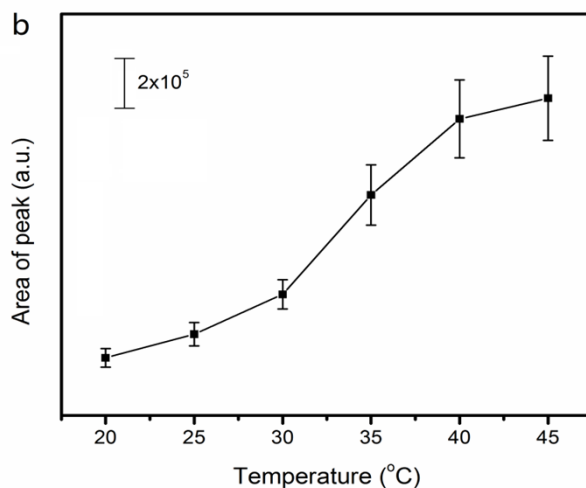

Figure S10 The areas of  $1584\text{ cm}^{-1}$  peak in the SERS spectra of  $10^{-6}\text{ M}$  PMBA aqueous solution using AgNPs/PNIPAM hybrid microgels as substrates as a function of temperature at pH 6.0 (a) and pH 4.0 (b)

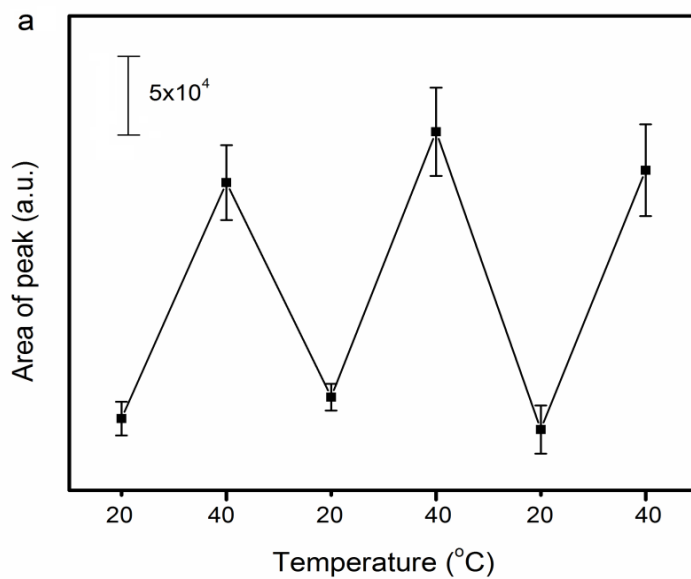

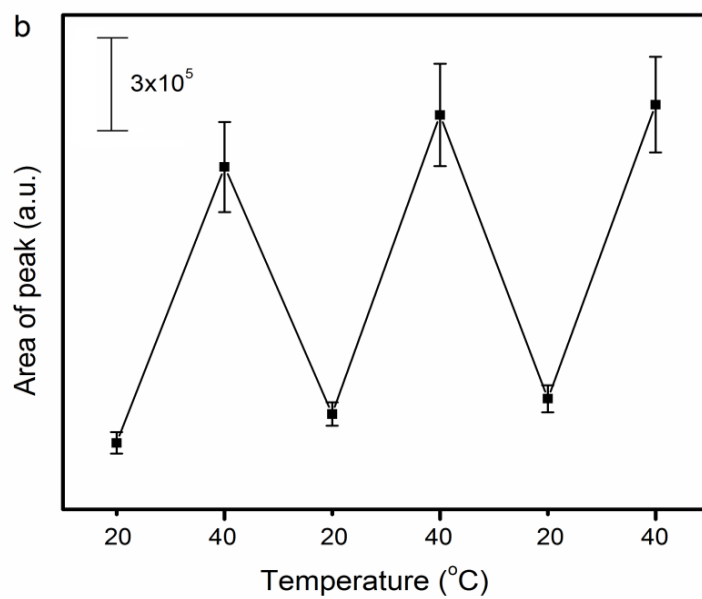

Figure S11 The areas of  $1584\text{ cm}^{-1}$  peaks of the SERS spectra of  $10^{-6}\text{ M}$  PMBA aqueous solution using AgNPs/(PNIPAM/PAA IPN) hybrid microgels as substrates at alternating temperatures between  $20^{\circ}\text{C}$  and  $40^{\circ}\text{C}$  under pH 6.0 (a) or 4.0 (b)



Table S1 Temperature measuring results using AgNPs/(PNIPAM/PAA IPN) hybrid microgels as SERS microsensors (pH=6.0)

| Measuring times          | Temperature 1                          |                               | Temperature 2                          |                               |
|--------------------------|----------------------------------------|-------------------------------|----------------------------------------|-------------------------------|
|                          | 1584 cm <sup>-1</sup> peak area (a.u.) | The obtained temperature (°C) | 1584 cm <sup>-1</sup> peak area (a.u.) | The obtained temperature (°C) |
| 1                        | 154029                                 | 22.9                          | 300552                                 | 42.2                          |
| 2                        | 160567                                 | 25.1                          | 283229                                 | 37.8                          |
| 3                        | 170961                                 | 27.8                          | 287923                                 | 38.7                          |
| 4                        | 157717                                 | 24.0                          | 271717                                 | 36.5                          |
| 5                        | 149944                                 | 21.7                          | 279652                                 | 37.3                          |
| Average temperature (°C) | 24.3                                   |                               | 38.5                                   |                               |
| RSD (%)                  | 9.6                                    |                               | 5.7                                    |                               |

Table S2 pH value measuring results using AgNPs/(PNIPAM/PAA IPN) hybrid microgels as SERS microsensors (T=20°C)

| Measuring times  | pH 1                                   |                       | pH 2                                   |                       |
|------------------|----------------------------------------|-----------------------|----------------------------------------|-----------------------|
|                  | 1584 cm <sup>-1</sup> peak area (a.u.) | The obtained pH value | 1584 cm <sup>-1</sup> peak area (a.u.) | The obtained pH value |
| 1                | 548073                                 | 3.6                   | 144176                                 | 6.2                   |
| 2                | 464602                                 | 4.3                   | 146897                                 | 6.1                   |
| 3                | 550823                                 | 3.5                   | 132506                                 | 6.3                   |
| 4                | 540573                                 | 3.8                   | 161294                                 | 5.9                   |
| 5                | 509897                                 | 4.0                   | 138323                                 | 6.3                   |
| Average pH value | 3.8                                    |                       | 6.2                                    |                       |
| RSD (%)          | 7.9                                    |                       | 3.2                                    |                       |
